# Supplementary material for: Therapeutic effect of baicalin on experimental autoimmune encephalomyelitis is mediated by SOCS3 regulatory pathway
Source: PubMed Central journal article supplement (PMC4663791; doi:10.1038/srep17407), 2015-11-30
Supplement: srep17407-s1.pdf [file srep17407-s1.pdf]

**Therapeutic effect of baicalin on experimental autoimmune encephalomyelitis  
is mediated by SOCS3 regulatory pathway**

Yuan Zhang<sup>1,2†</sup>, Xing Li<sup>1,2†</sup>, Bogoljub Ciric<sup>1</sup>, Cun-gen Ma<sup>3</sup>, Bruno Gran<sup>4</sup>, Abdolmohamad Rostami<sup>1</sup>, and Guang-Xian Zhang<sup>1\*</sup>

<sup>1</sup> Department of Neurology, Thomas Jefferson University, Philadelphia, PA, USA

<sup>2</sup> Key Laboratory of the Ministry of Education for Medicinal Resources and Natural Pharmaceutical Chemistry, Northwest China National Engineering Laboratory for Resource Development of Endangered Crude Drugs, College of Life Sciences, Shaanxi Normal University, Xi'an, China

<sup>3</sup> Institute of Brain Science, Department of Neurology, Shanxi Datong University Medical School, Datong, China

<sup>4</sup> Clinical Neurology Research Group, Division of Clinical Neuroscience, University of Nottingham School of Medicine, UK

† Equal contribution

\* Correspondence: Guang-Xian Zhang, MD, PhD, Phone: 215-955 8935, Email: [Guang-Xian.Zhang@jefferson.edu](mailto:Guang-Xian.Zhang@jefferson.edu)

## Supplementary Information

**Figure s1. Determination of the optimal dose of Ba in EAE suppression.** C57BL/6 mice were immunized with MOG<sub>35-55</sub> peptide/CFA to induce acute EAE as described in Materials and Methods. Ba in PBS was i.p. injected at 50, 100, or 200 mg/kg daily, starting at day 10 p.i. (disease onset). Results are shown as mean  $\pm$  SEM (n = 5 each group).

**Figure s2. Ba treatment did not influence numbers and percentages of splenic CD4<sup>+</sup> or CD8<sup>+</sup> T cells.** (a) The percentage of CD4<sup>+</sup> or CD8<sup>+</sup> cells in the lymphocyte gate from the spleen of Ba-treated or control EAE mice was analyzed by flow cytometry. (b) Absolute numbers of cells expressing these antigens were calculated by multiplying the total numbers of splenocytes and percentage of CD4<sup>+</sup> or CD8<sup>+</sup> T cells (Mean  $\pm$  SE; n = 5 each group). One representative of three experiments is shown.

**Figure s3. *In vitro* effect of Ba on cytokine production of splenocytes from EAE mice.** Splenocytes of untreated EAE mice were harvested at day 12 p.i. (disease onset).  $2 \times 10^6$  splenocytes/ml were cultured with MOG<sub>35-55</sub> at 25  $\mu$ g/ml in the presence of Ba (0, 5, 10, 20  $\mu$ g/ml). Cytokine production was determined from 48 h culture supernatants by ELISA. Results are shown as mean  $\pm$  SEM (n = 6 each group). \*\*\* $P < 0.001$ . One representative of three experiments is shown.

**Figure s4. Effects of Ba treatment on APCs.** Splenocytes or CNS MNCs of Ba- or PBS-treated EAE mice were isolated at day 18 p.i. and incubated with MOG<sub>35-55</sub> (25  $\mu$ g/ml) for 72 h (for splenocytes) or overnight for (CNS MNCs). CD11b<sup>+</sup> and CD11c<sup>+</sup> cells were gated and their

expression of CD80 and CD86 was analyzed by flow cytometry. One representative of three experiments is shown.

**Figure s5. Effect of Ba on naïve CD4<sup>+</sup> cell viability, apoptosis, and proliferation *in vitro*.**

Purified CD4<sup>+</sup> T cells from spleens of naïve C57BL/6 mice were stimulated with anti-CD3e and anti-CD28 at indicated concentrations of Ba for 24 h for cell viability assay and 72 h for cell proliferation and apoptosis assays. **(a)** Cell viability was determined using the MTS-based method. **(b)** To determine apoptosis, cells were stained with Annexin V and PI before being analyzed by flow cytometry. **(c)** Cell proliferation was determined by BrdU incorporation test. Data are expressed as mean  $\pm$  SEM (n = 6 each group). \**P* < 0.05; \*\**P* < 0.01; \*\*\**P* < 0.001. One representative of three experiments is shown.

**Figure s6. Role of Ba in Th2 cell differentiation.** Purified naïve CD4<sup>+</sup> T cells were cultured with different concentrations of Ba under Th2 polarizing conditions and analyzed at 3 days of culture. **(a)** The percentage of Th2 cells in CD4<sup>+</sup> T cells was analyzed by intracellular IL-4 secretion. **(b)** Percentages of IL-4 positive cells. **(c)** GATA3 mRNA levels were analyzed by real-time PCR. Data are expressed as mean  $\pm$  SEM (n = 5 each group). \**P* < 0.05; \*\**P* < 0.01; \*\*\**P* < 0.001. One representative of three experiments is shown.

**Figure s7. Safety consideration of Ba treatment.** Naïve female C57BL/6 mice (6-8 weeks old) were injected i.p. daily with PBS or Ba at 100 mg/kg/day, the same dosage as treating EAE mice, and the administration continued for 28 d. **(a)** Body weights of mice were recorded every three days. **(b)** For ex vivo proliferation, splenocytes were isolated from PBS- and Ba-treated mice, and stimulated with or without Con A (5  $\mu$ g/ml). **(c)** Blood examination was conducted on red blood cell count (RBC,  $\times 10^6/\mu$ L), hemoglobin concentration (HGB, g/L), white blood cell count (WBC,

$\times 10^3/\mu\text{L}$ ) and platelet count (PLT,  $\times 10^3/\mu\text{L}$ ) by the automated hematologic analyzer after the last administration. Data are expressed as mean  $\pm$  SEM (n = 5 each group). One representative of three experiments is shown.

Figure s1

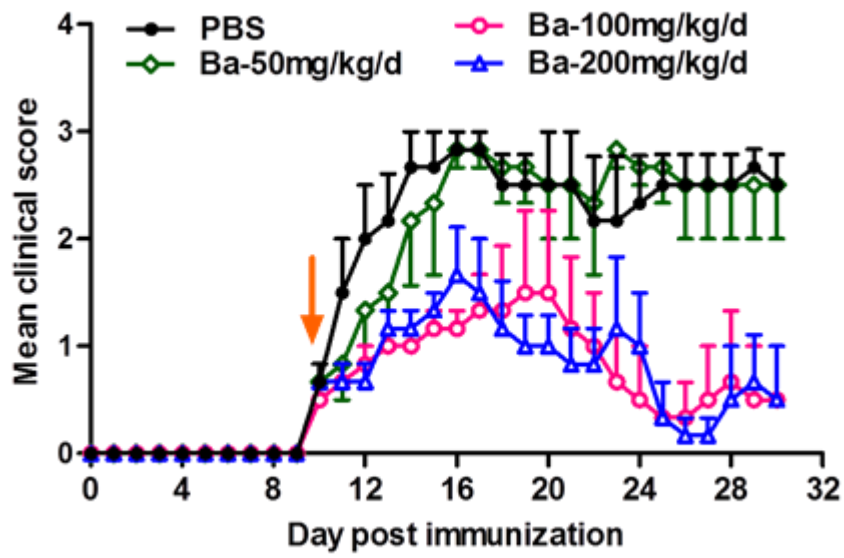

Figure s2

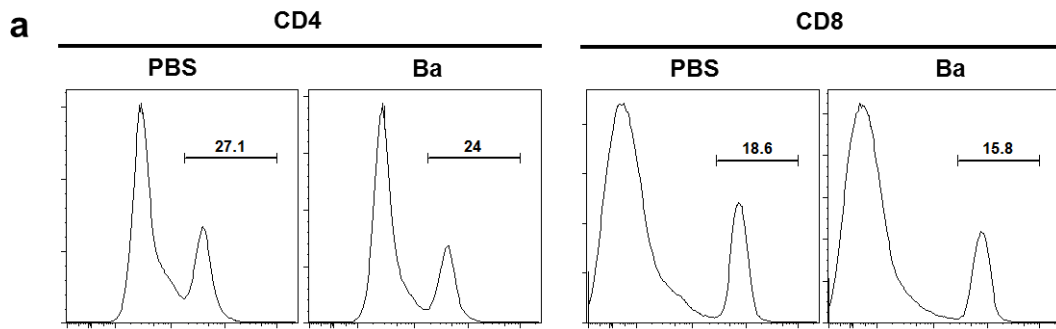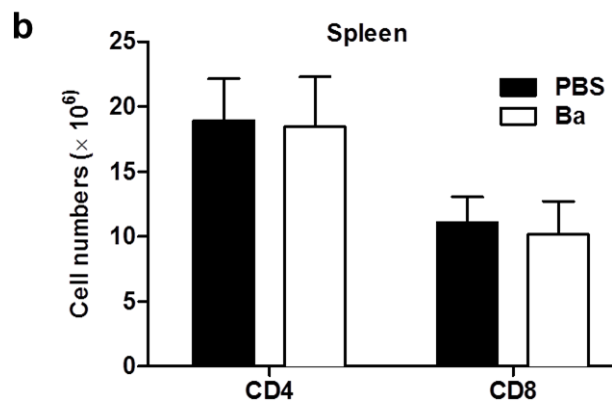

Figure s3

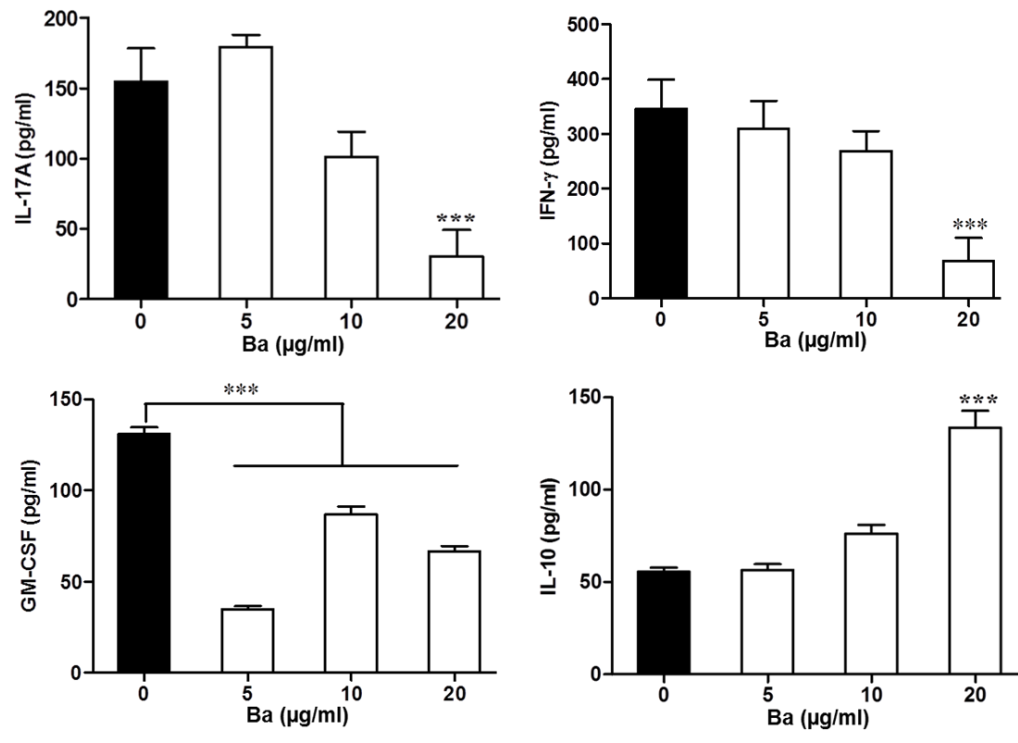

Figure s4

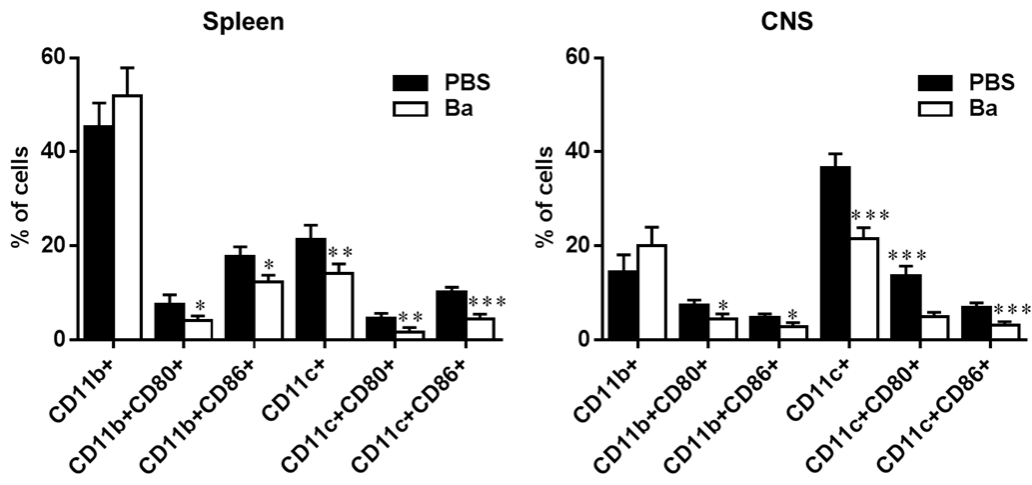



Figure s5

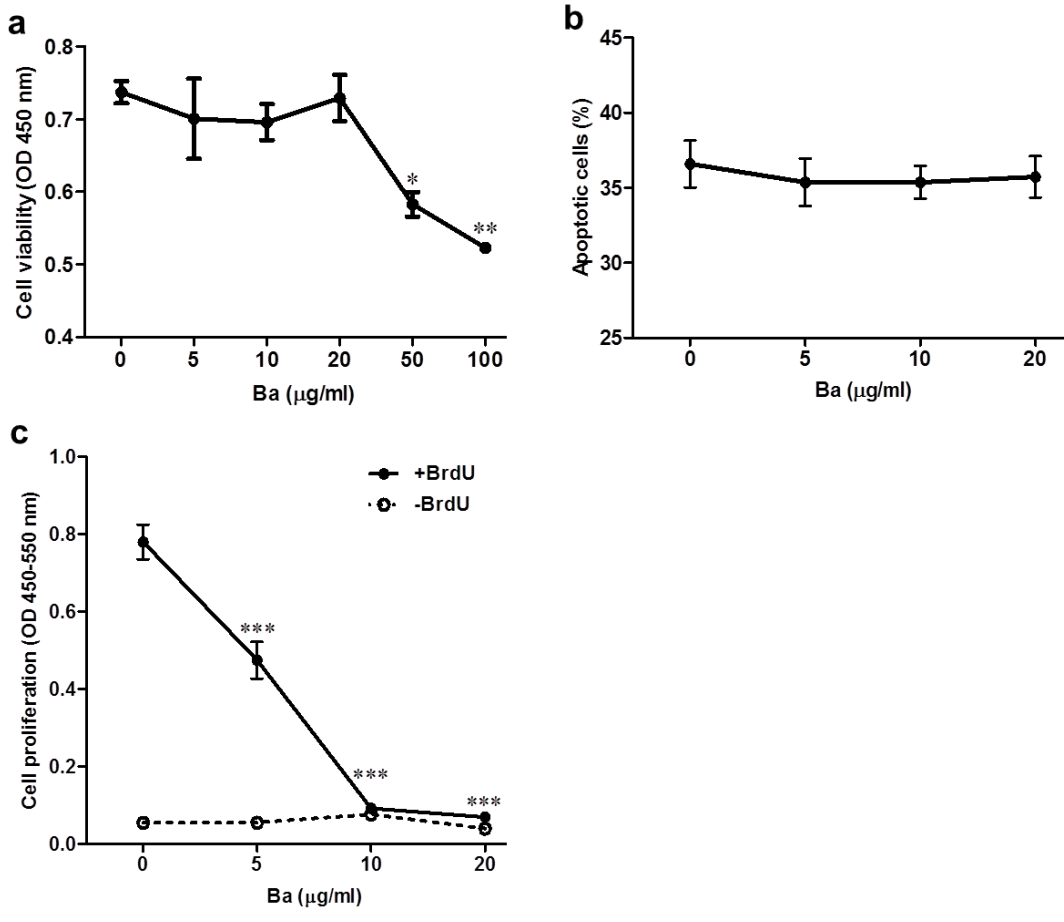

Figure s6

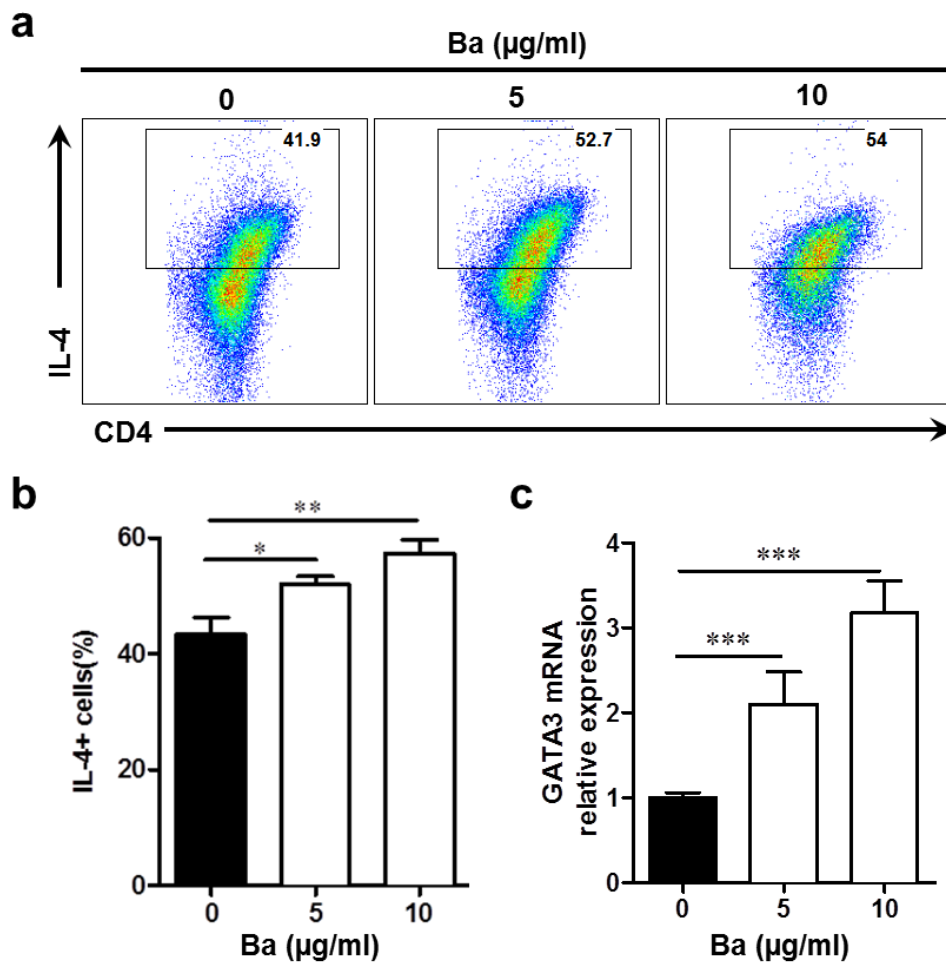

Figure s7

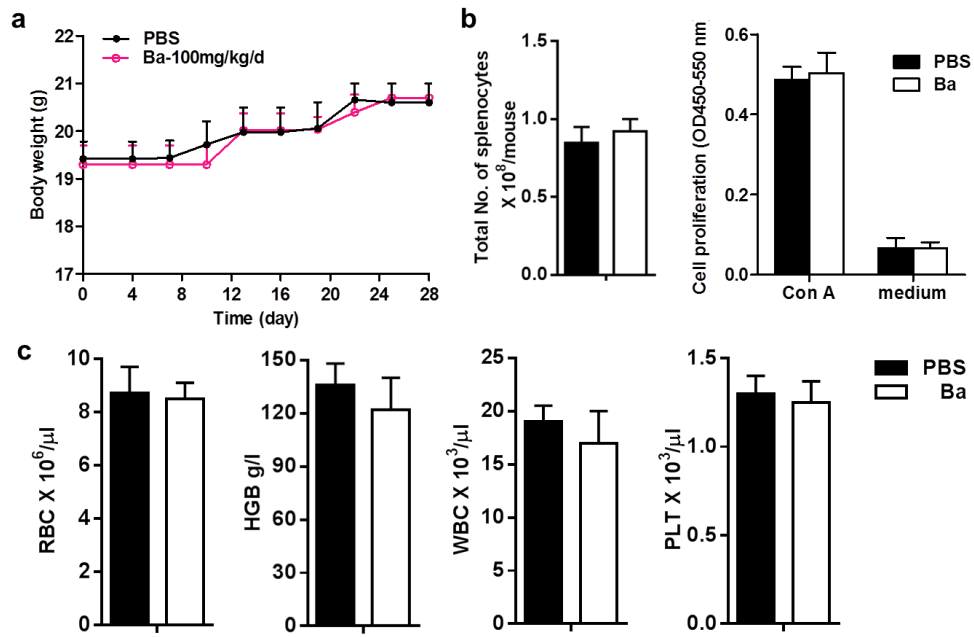

**Table s1. Clinical features of EAE in mice in the administration of PBS or Ba**

| Group                               |     | Disease incidence (%) | Mean maximal score | Cumulative disease score | Average day of onset |
|-------------------------------------|-----|-----------------------|--------------------|--------------------------|----------------------|
| Prophylactic treatment regimen      | PBS | 100                   | 3.92 ± 0.32        | 58.1 ± 6.54              | 14.75 ± 0.55         |
|                                     | Ba  | 79.3                  | 1.66 ± 0.52**      | 15.8 ± 4.22**            | 20.88 ± 1.21**       |
| Therapeutic regimen (disease onset) | PBS | 100                   | 3.77 ± 0.29        | 49.2 ± 8.33              | 12.05 ± 1.32         |
|                                     | Ba  | 100                   | 2.09 ± 0.76*       | 18.2 ± 9.54**            | 11.74 ± 1.65         |
| Therapeutic regimen (disease peak)  | PBS | 100                   | 3.96 ± 0.16        | 55.4 ± 5.85              | 11.54 ± 1.36         |
|                                     | Ba  | 100                   | 2.81 ± 0.29*       | 32.1 ± 7.51**            | 10.96 ± 1.6          |

Values are expressed as mean ± SEM \* $P < 0.05$ , \*\* $P < 0.01$  compared with PBS control.

**Table s2. Primers used for real-time quantitative RT-PCR analysis**

| Gene           | Primers                   |                           |
|----------------|---------------------------|---------------------------|
|                | Forward (5'-3')           | Rewards (5'-3')           |
| CCL20          | GTGGCAAGCGTCTGCTCT        | TGTACGAGAGGCAACAGTCG      |
| CXCL1          | CTTGCCCTTGACCCCTGAAGCTC   | AGCAGTCTGTCTTCTTTCTCCGT   |
| CXCL2          | CCCCCTGGTTCAGAAAATCA      | GCTCCTCCTTTCCAGGTCAGT     |
| CXCL9          | TGCACGATGCTCCTGCA         | AGGTCTTTGAGGGATTTGTAGTGG  |
| CXCL10         | CTCATCCTGCTGGGTCTGAG      | CCTATGGCCCTCATTCTCAC      |
| CXCL11         | AACAGGGGCGCTGTCTTT        | CTTTGTGCGCAGCCGTTACTC     |
| CXCL12         | ACAAGTGTGCATTGACCCGA      | TACCGTCAGGTTTGAGCACC      |
| Foxp3          | AGGAGCCGCAAGCTAAAAGC      | TGCCTTCGTGCCCACTGT        |
| iNOS           | ACCCACATCTGGCAGAATGAG     | AGCCATGACCTTTCGCATTAG     |
| GAPDH          | CCAATGTGTCCGTCGTGGATCT    | GTTGAAGTCGCAGGAGACAACC    |
| GATA-3         | GGAGTCTCCAAGTGTGCGAA      | TGGAATGCAGACACCACCTC      |
| GFP            | ACAGCGTGATCTTCACCGAC      | ATGGCGCTCTTGAAGTGCAT      |
| GM-CSF         | GTGGTCTACAGCCTCTCAGCA     | GCATGTCATCCAGGAGGTTT      |
| IFN- $\gamma$  | ATGAACGCTACACACTGCATC     | CCATCCTTTTGCCAGTTCCTC     |
| IL-1 $\beta$   | CTCTCCACCTCAATGGACAGA     | TGCTTGGGATCCACACTCTC      |
| IL-5           | TGTCCCTACTCATAAAAATCACCAG | TCCGTCTCTCCTCGCCACAC      |
| IL-6           | ACACATGTTCTCTGGGAAATCGT   | AAGTGCATCATCGTTGTTTCATACA |
| IL-10          | CTGAAGACCCTCAGGATGCG      | AGACACCTTGGTCTTGGAGC      |
| IL-11          | CCTGGCAGACACACGGCAACT     | CTCGAAGCCTTGTGAGCACACC    |
| IL-12p35       | CATCGATGAGCTGATGCAGT      | CAGATAGCCCATCACCCCTGT     |
| IL-17A         | CTCAACCGTTCCACGTCAC       | ACACCCACCAGCATCTTCT       |
| IL-17F         | TGCTACTGTTGATGTTGGGAC     | AATGCCCTGGTTTTGGTTGAA     |
| IL-21          | GATCCTGAACTTCTATCAGCTCCAC | GGCATTTAGCTATGTGCTTCTGTT  |
| IL-22          | GTGAGAAGCTAACGTCCATC      | GTCTACCTCTGGTCTCATGG      |
| IL-23p19       | GACTCAGCCAACCTCCTCCAG     | GGCACTAAGGGCTCAGTCAG      |
| IL-27p28       | CAGATAGCCCATCACCCCTGT     | GGGGCAGCTTCTTTTCTTCT      |
| MMP3           | ATGAAGGGTCTTCCGGTCCT      | ACACCACACCTGGGCTTATG      |
| MMP9           | CCAGATGATGGGAGAGAAGC      | GGCCTTTAGTGTCTGGCTGT      |
| ROR $\gamma$ t | GGAACCAGAACAGGGTCCAG      | TAGAAGGTCTCCAGTCGCA       |
| SOCS3          | TTTGACAAGCGGACTCTCCC      | AAGCGCAAACAAGTTCAGC       |
| T-bet          | ATTGGTTGGAGAGGAAGCGG      | GCACCAGGTTTCGTGACTGTA     |
| TGF- $\beta$   | CACTGATACGCCTGAGTG        | GTGAGCGCTGAATCGAAA        |
| TNF $\alpha$   | GCCACAAGCAGGAATGAGAAG     | GCCACAAGCAGGAATGAGAAG     |
